# Supplementary material
Source: publisher figshare collection journal article supplement (https://acs.figshare.com/ndownloader/files/16530779)
Supplement: Supplementary file 1 [file 16530779]

# Supporting Information

## **Tetrameric A $\beta$ 40 and A $\beta$ 42 $\beta$ -Barrel Structures by Extensive Atomistic Simulations. II. In Aqueous Solution**

Phuong H Nguyen,<sup>1,2</sup> Josep M Campanera,<sup>3</sup> Son Tung Ngo,<sup>4,5</sup> Antoine Loquet,<sup>6</sup> Philippe Derreumaux<sup>7,8\*</sup>

1 CNRS, Université de Paris, UPR 9080, Laboratoire de Biochimie Théorique, 13 rue Pierre et Marie Curie, F-75005, Paris, France

2 Institut de Biologie Physico-Chimique-Fondation Edmond de Rothschild, PSL Research University, Paris, France

3 Departament de Fisicoquímica, Facultat de Farmàcia, Universitat de Barcelona, 08028 Barcelona, Catalonia, Spain

4 Laboratory of Theoretical and Computational Biophysics, Ton Duc Thang University, Ho Chi Minh City, Vietnam

5 Faculty of Applied Science, Ton Duc Thang University, Ho Chi Minh City, Vietnam

6 Institute of Chemistry and Biology of Membranes and Nanoobjects, UMR5248 CNRS, Université de Bordeaux, France

7 Laboratory of Theoretical Chemistry, Ton Duc Thang University, Ho Chi Minh City, Vietnam

8 Faculty of Pharmacy, Ton Duc Thang University, Ho Chi Minh City, Vietnam

\* Correspondence [philippe.derreumaux@tdtu.edu.vn](mailto:philippe.derreumaux@tdtu.edu.vn)

### **(A) REMD simulations**

The GROMACS program was used with periodic boundary conditions, a timestep of 2 fs using SHAKE or LINCS and the velocity Verlet integrator.<sup>1</sup> The peptides at pH 7 have  $\text{NH}_3^+$  and  $\text{CO}_2^-$  termini, deprotonated Glu and Asp, protonated Arg and Lys, and neutral His with a protonated Nepsilon atom. The temperature distributions were determined by using van der Spoel's method.<sup>2</sup>

The perfect barrels of A $\beta$ 40 and A $\beta$ 42 were centred in truncated octahedron boxes of 519 and 729 nm<sup>3</sup> containing 17000 and 23000 TIP3P water molecules, leading to a peptide concentration of 12.8 and 9.2 mM. The systems were neutralized by  $\text{Na}^+$  ions resulting in 52000 and 72000 atoms for A $\beta$ 40 and A $\beta$ 42, respectively. The first protein force field is the Amber ff99SB-ILDN force field. The velocity-rescaling thermostat was employed, electrostatic interactions were calculated using the particle mesh Ewald method and a cut-off of 1.1 nm, and Van der Waals interactions used a cut-off of 1.2 nm.<sup>3-5</sup> REMD simulations were performed with 64 and 72 replicas for A $\beta$ 40 and A $\beta$ 42, with a temperature range of 300-400 K. Exchanges between two consecutive replicas were attempted every 2 ps, leading to a mean acceptance ratio of 25%, and each replica ran for 350 ns. The total CPU time is 1.800.000 hours using 1152 cores and 16 cores/replica. Secondary structure was determined using the STRIDE program.<sup>6</sup> CCS values for the  $\beta$ -barrel and non  $\beta$ -barrel states were calculated using the MOBCAL software.<sup>7</sup>

REMD simulations were also repeated with the OPLS/TIP3P force field and the CHARMM36m/TIP3P-modified force field for 150 ns each starting from the most populated cluster Amber ff99SB-ILDN for both A $\beta$ 40 and A $\beta$ 42 (states S1 see Figure 3). For both systems, we used the same number of replicas as for Amber f99ILDN/TIP3 and the CPU time using OPLS/TIP3P and CHARMM36m/TIP3P force fields is 1.500.000 hours.

REMD simulation with Amber99SB-DISP was also performed starting from the S1 state for A $\beta$ 42 peptide only. Since DISP is based on the TIP4P force field, we used up to 90 replicas, covering 300 to 400 K and leading to an acceptance ratio of 25%. For this simulation, the CPU time is 810.000 hours using 1800 cores and 20 cores/replica.

**(B) Analysis of A $\beta$ 40 and A $\beta$ 42 by REMD with Amber ff99SB-ILDN/TIP3P**

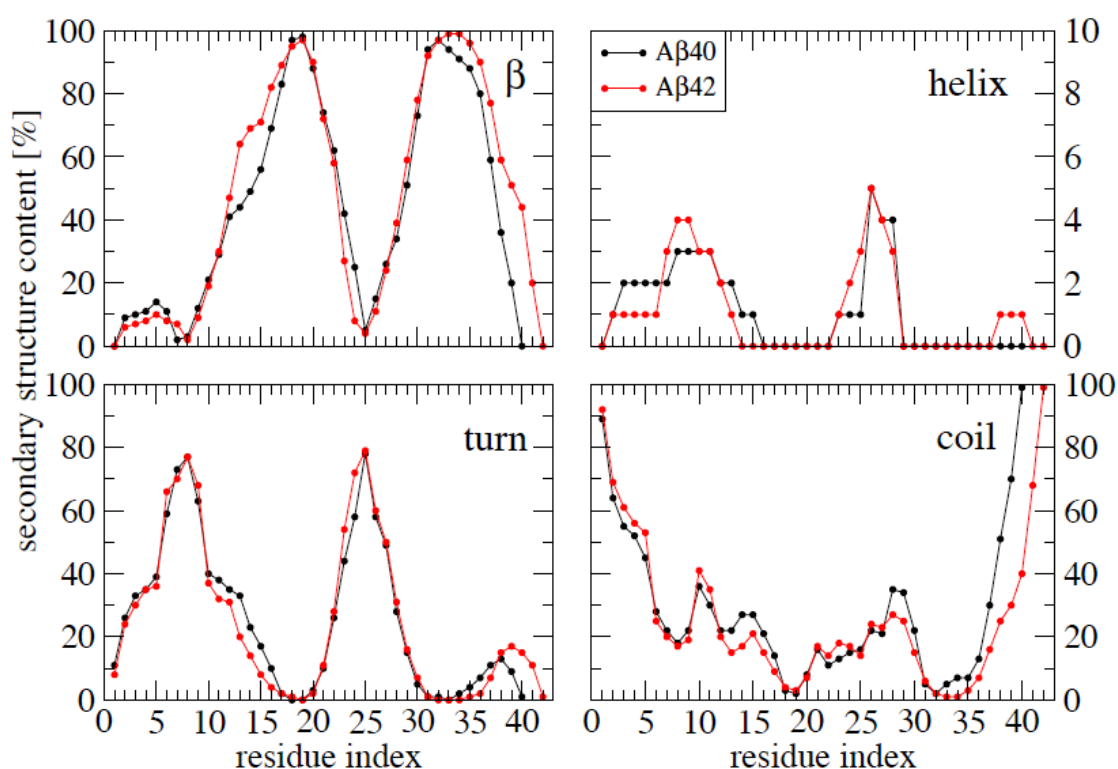

**Figure S1.** Secondary structure propensities of each amino acid of A $\beta$ 40 (black) and A $\beta$ 42 (red) peptides at 315 K using the time interval 50-350 ns. Error bars of 2% max are not shown for clarity.

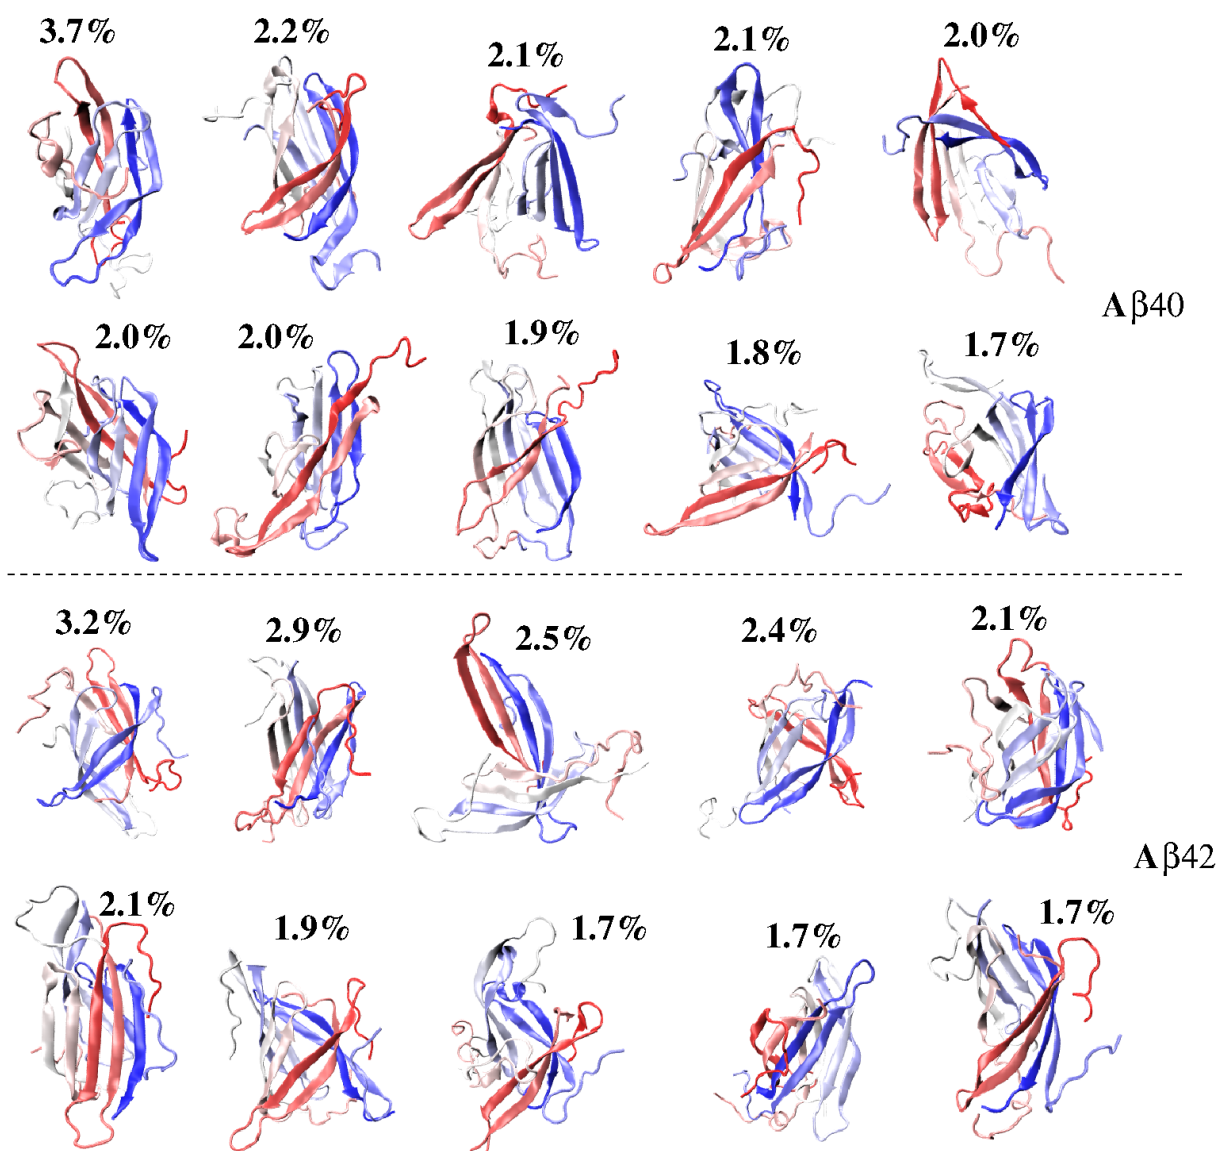

**Figure S2.** The first ten clusters of A $\beta$ 40 and A $\beta$ 42 tetramers at 315 K using the time interval 50-350 ns.

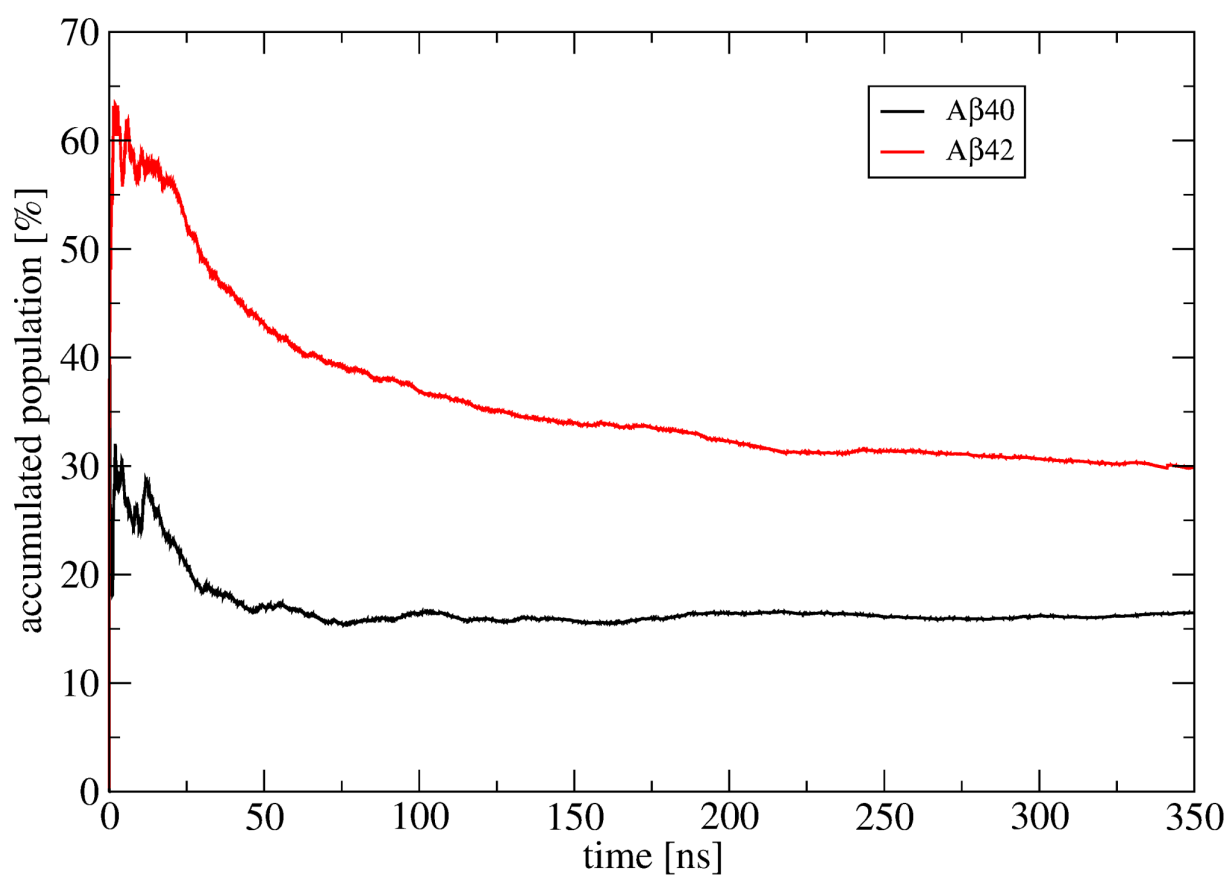

Figure S3. Accumulated population of the barrel structures for  $A\beta 40$  (black) and  $A\beta 42$  (red) peptides at 315 K. Here, the accumulated population is calculated as:  $p_{\text{acc}}(t) = \frac{1}{\tau} \int_0^t p(\tau)$

| System | State | P [%] | RMSD [nm] | R <sub>g</sub> [nm] | N <sub>HB</sub> | N <sub>HB1</sub> | N <sub>HB2</sub> | N <sub>HB3</sub> | CCS [Å <sup>2</sup> ] |
|--------|-------|-------|-----------|---------------------|-----------------|------------------|------------------|------------------|-----------------------|
| Aβ40   | 1     | 31.43 | 0.60      | 1.33                | 11.02           | 6.76             | 3.93             | 6.33             | 2197                  |
|        | 2     | 25.12 | 0.74      | 1.36                | 10.25           | 7.10             | 2.87             | 5.35             | 1933                  |
|        | 3     | 19.55 | 0.48      | 1.34                | 11.28           | 7.71             | 3.29             | 5.39             | 2299                  |
|        | 4     | 7.32  | 0.90      | 1.40                | 9.54            | 6.77             | 2.06             | 4.24             | 2342                  |
| Aβ42   | 1     | 52.68 | 0.44      | 1.34                | 13.10           | 6.04             | 6.68             | 11.32            | 2030                  |
|        | 2     | 16.32 | 0.76      | 1.51                | 12.38           | 4.64             | 7.65             | 15.30            | 2474                  |

**Table S1.** Aβ40 and Aβ42 non β-barrel characterizations using the time interval 50-350 ns at 315 K. For each state, we give the population P (in %), the tilt angle  $\alpha$  (in degrees), the inner diameter of the pore (in nm), the RMSD (in nm) with respect to state 0 and the radius of gyration R<sub>g</sub> (in nm) using only residues 11-36, and the total number of interchain H-bonds between residues 11-36 (N<sub>HB</sub>), interpeptide H-bonds between residues 11-21 and 11-21 (N<sub>HB1</sub>), between residues 29-36 and 29-36 (N<sub>HB2</sub>), and between residues 29-40 (N<sub>HB3</sub>). We also give the collision cross-section surface (CCS). All values are obtained using all conformations belonging to each cluster. Error bars on all CCS values are on the order of 75 Å<sup>2</sup>.

| System        | Salt-bridge | Population   |             |             |              |
|---------------|-------------|--------------|-------------|-------------|--------------|
|               |             | chain 1      | chain 2     | chain 3     | chain 4      |
| $A\beta_{40}$ | E22-K28     | $18 \pm 1.7$ | $0 \pm 0$   | $0 \pm 0$   | $14 \pm 0.5$ |
|               | D23-K28     | $8 \pm 2.9$  | $4 \pm 0.7$ | $5 \pm 1.5$ | $3 \pm 1.0$  |
| $A\beta_{42}$ | E22-K28     | $15 \pm 1.5$ | $1 \pm 0.2$ | $0 \pm 0$   | $16 \pm 0.3$ |
|               | D23-K28     | $9 \pm 2.0$  | $3 \pm 0.3$ | $3 \pm 0.5$ | $7 \pm 1.8$  |

**Table S2.** Populations of the intramolecular E22-K28 and D23-K28 salt-bridges in the four chains (or hairpins) using the time intervals 50 to 350 ns. A salt-bridge is considered formed if the distances are between the CG atom of D23 (or CD atom of E22) and the NZ atom of K28 are below a cutoff distance of 0.45 nm.

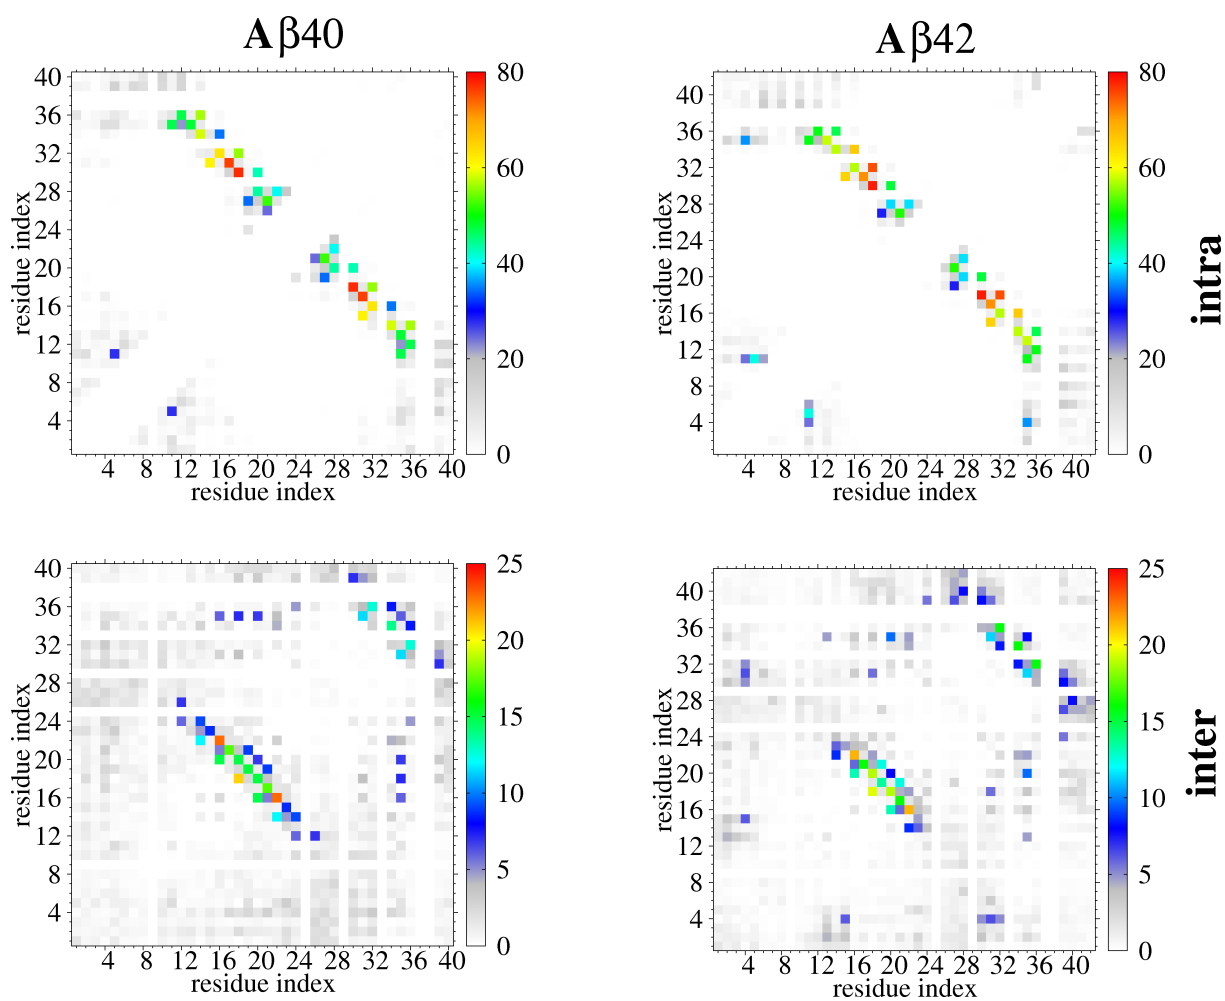

**Figure S4.** The side-chain – side-chain contact probabilities (in %) of the  $\beta$ -barrel states for the A $\beta$ 40 (left) and A $\beta$ 42 (right) tetramers at 315 K. The intramolecular maps are averaged over the four chains and the intermolecular maps averaged over the six pairs.



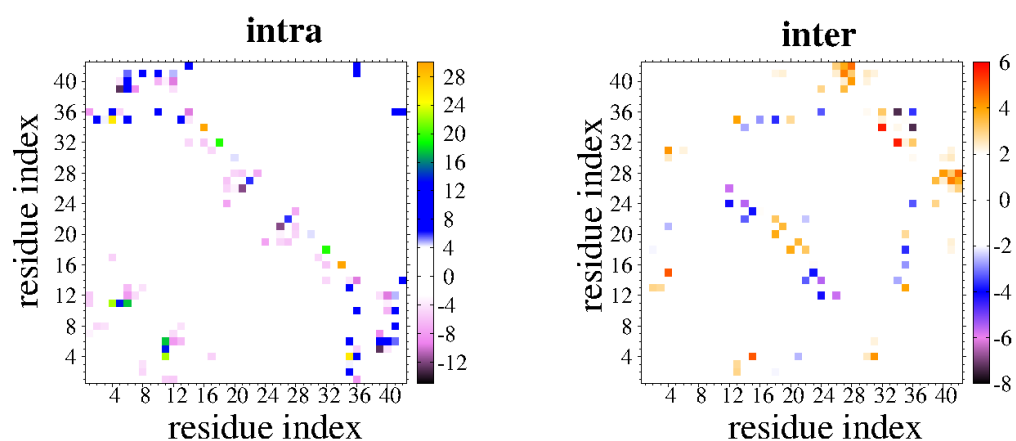

**Figure S5.** Differences in the contact map probabilities (in %) between the  $\beta$ -barrel states of A $\beta$ 42 and A $\beta$ 40 at 315 K. Positive values indicate higher probability for A $\beta$ 42. For clarity, absolute values between 0 and 4% (intramolecular) and between 0 and 2% (intermolecular) are not shown.

**(C) Analysis of A $\beta$ 40 and A $\beta$ 42 by REMD with OPLS/TIP3P**

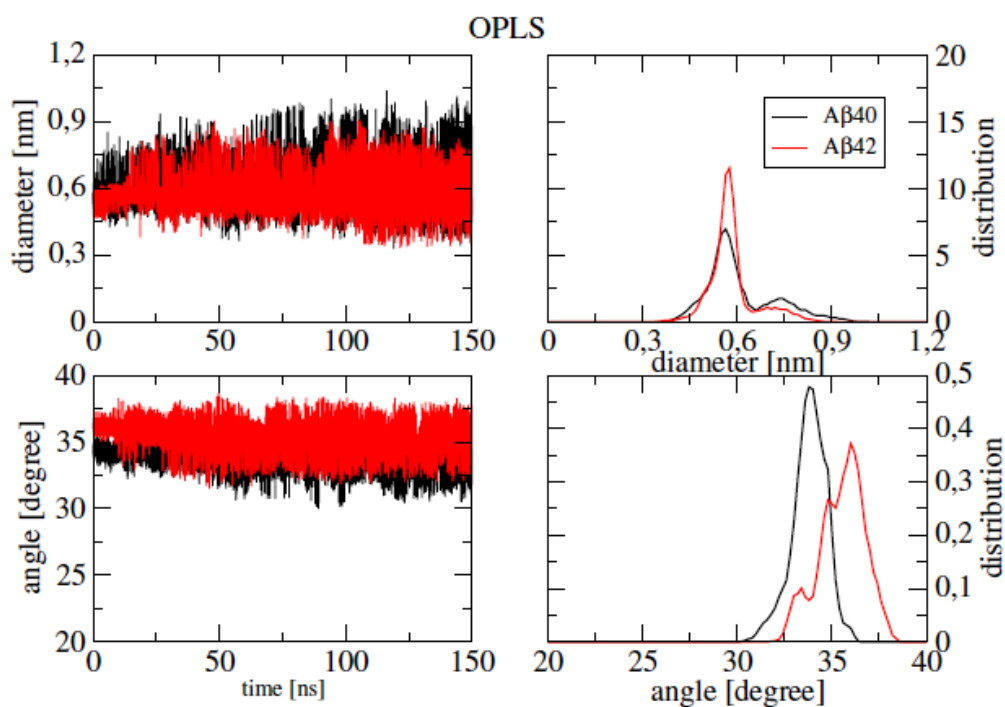

**Figure S6.** Time evolutions (left panels) and probability distributions (right panels) of the inner pore diameter and tilt angle for the A $\beta$ 40 (black) and A $\beta$ 42 (red) peptides using the full 150 ns REMD at 315 K with OPLS/TIP3P.

(D) Analysis of A $\beta$ 40 and A $\beta$ 42 REMD with CHARMM36M/TIP3P-modified

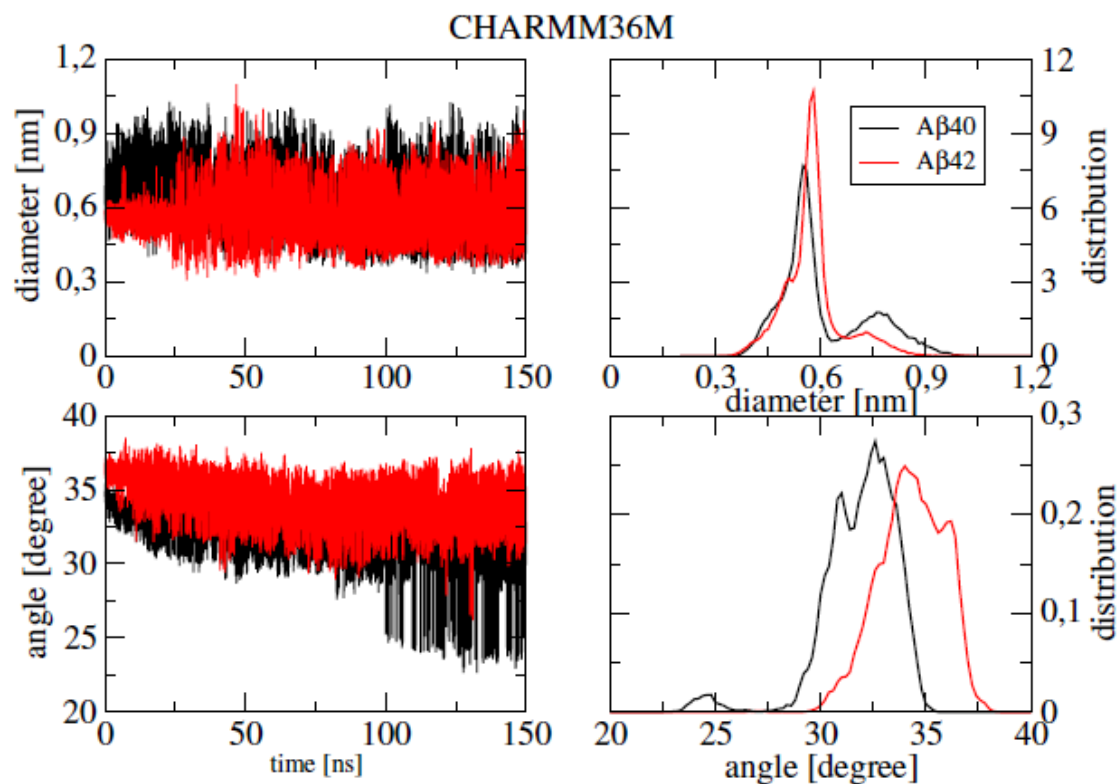

**Figure S7.** Time evolutions (left panels) and probability distributions (right panels) of the inner pore diameter and tilt angle for the A $\beta$ 40 (black) and A $\beta$ 42 (red) peptides using the full 150 ns REMD at 315 K with CHARMM36m/TIP3P-modified.

**(E) Analysis of A $\beta$ 42 by REMD simulations with AMBER99/DISP**

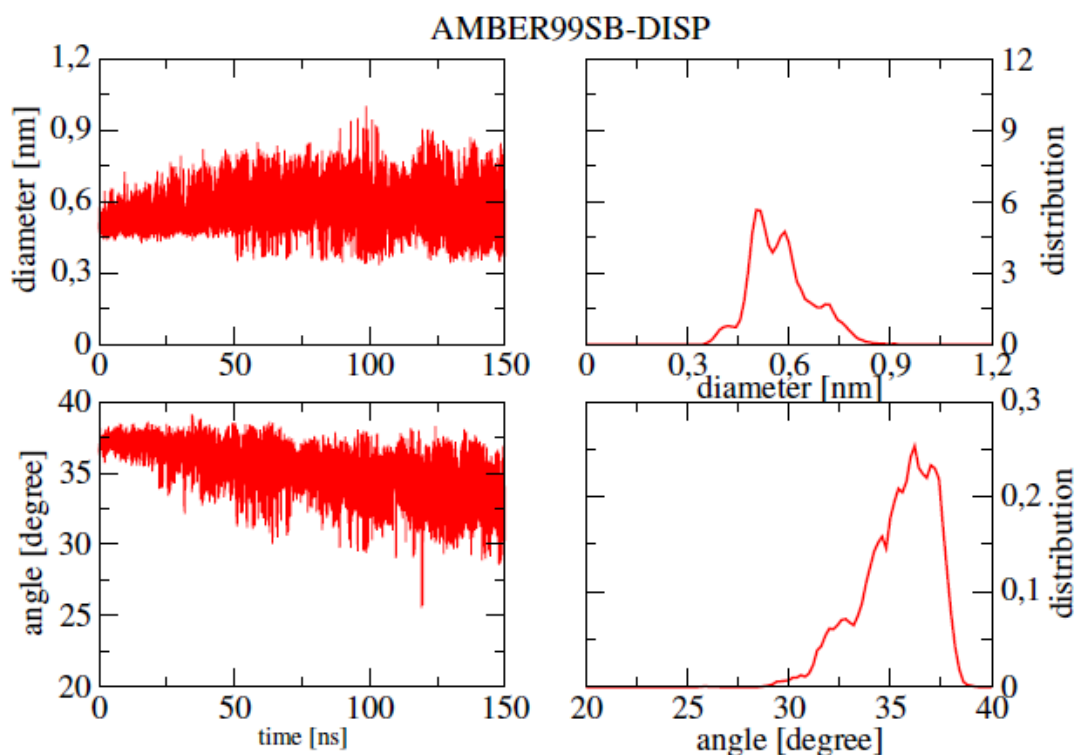

**Figure S8.** Time evolutions (left panels) and probability distributions (right panels) of the inner pore diameter and tilt angle for the A $\beta$ 42 peptides using the full 150 ns REMD at 315 K with AMBER99-DISP.

**References**

- (1) Van der Spoel, D.; Lindahl, E.; Hess, B.; Groenhof, G.; Mark, A.E.; Berendsen, H. J. GROMACS: Fast, Flexible, and Free. *J. Comput. Chem.* **2005**, *26*, 1701-1718.
- (2) Patriksson, A.; van der Spoel, D.A. Temperature Predictor for Parallel Tempering Simulations. *Phys. Chem. Chem. Phys.* **2008**, *10*, 2073-2077.
- (3) Evans, D.J.; Holian, B.L. The Nose-Hoover thermostat. *J. Chem. Phys.* **1985**, *83*, 4069.
- (4) Parinello, M.; Rahman, A. M. Crystal Structures and Pair Potentials: A Molecular-Dynamics Study. *Phys. Rev. Lett.* **1980**, *45*, 1196-1199.
- (5) Essmann, U.; Perera, L.; Berkowitz, M.L.; Darden, T.; Lee, H.; Pedersen, L.G. A Smooth Particle Mesh Ewald Method. *J. Chem. Phys.* **1995**, *103*, 8577-8593.
- (6) Frishman, D.; Argos, P. Knowledge-based Protein Secondary Structure Assignment. *Proteins* **1995**, *23*, 566-579.
- (7) Mesleh, M.F.; Hunter, J.M.; Shvartsburg, A.A.; Schatz, G.C.; Jarrold, M.F. Structural Information from Ion Mobility Measurements: Effects of the Long-Range Potential. *J. Phys. Chem.* **1996**, *100*, 16082-16086.
